# Supplementary material for: Construction of immune‐related risk signature for renal papillary cell carcinoma
Source: PubMed Central journal article supplement (PMC6346237; doi:10.1002/cam4.1905), 2018-12-05

# Altered in 169 (60.14%) of 281 samples.

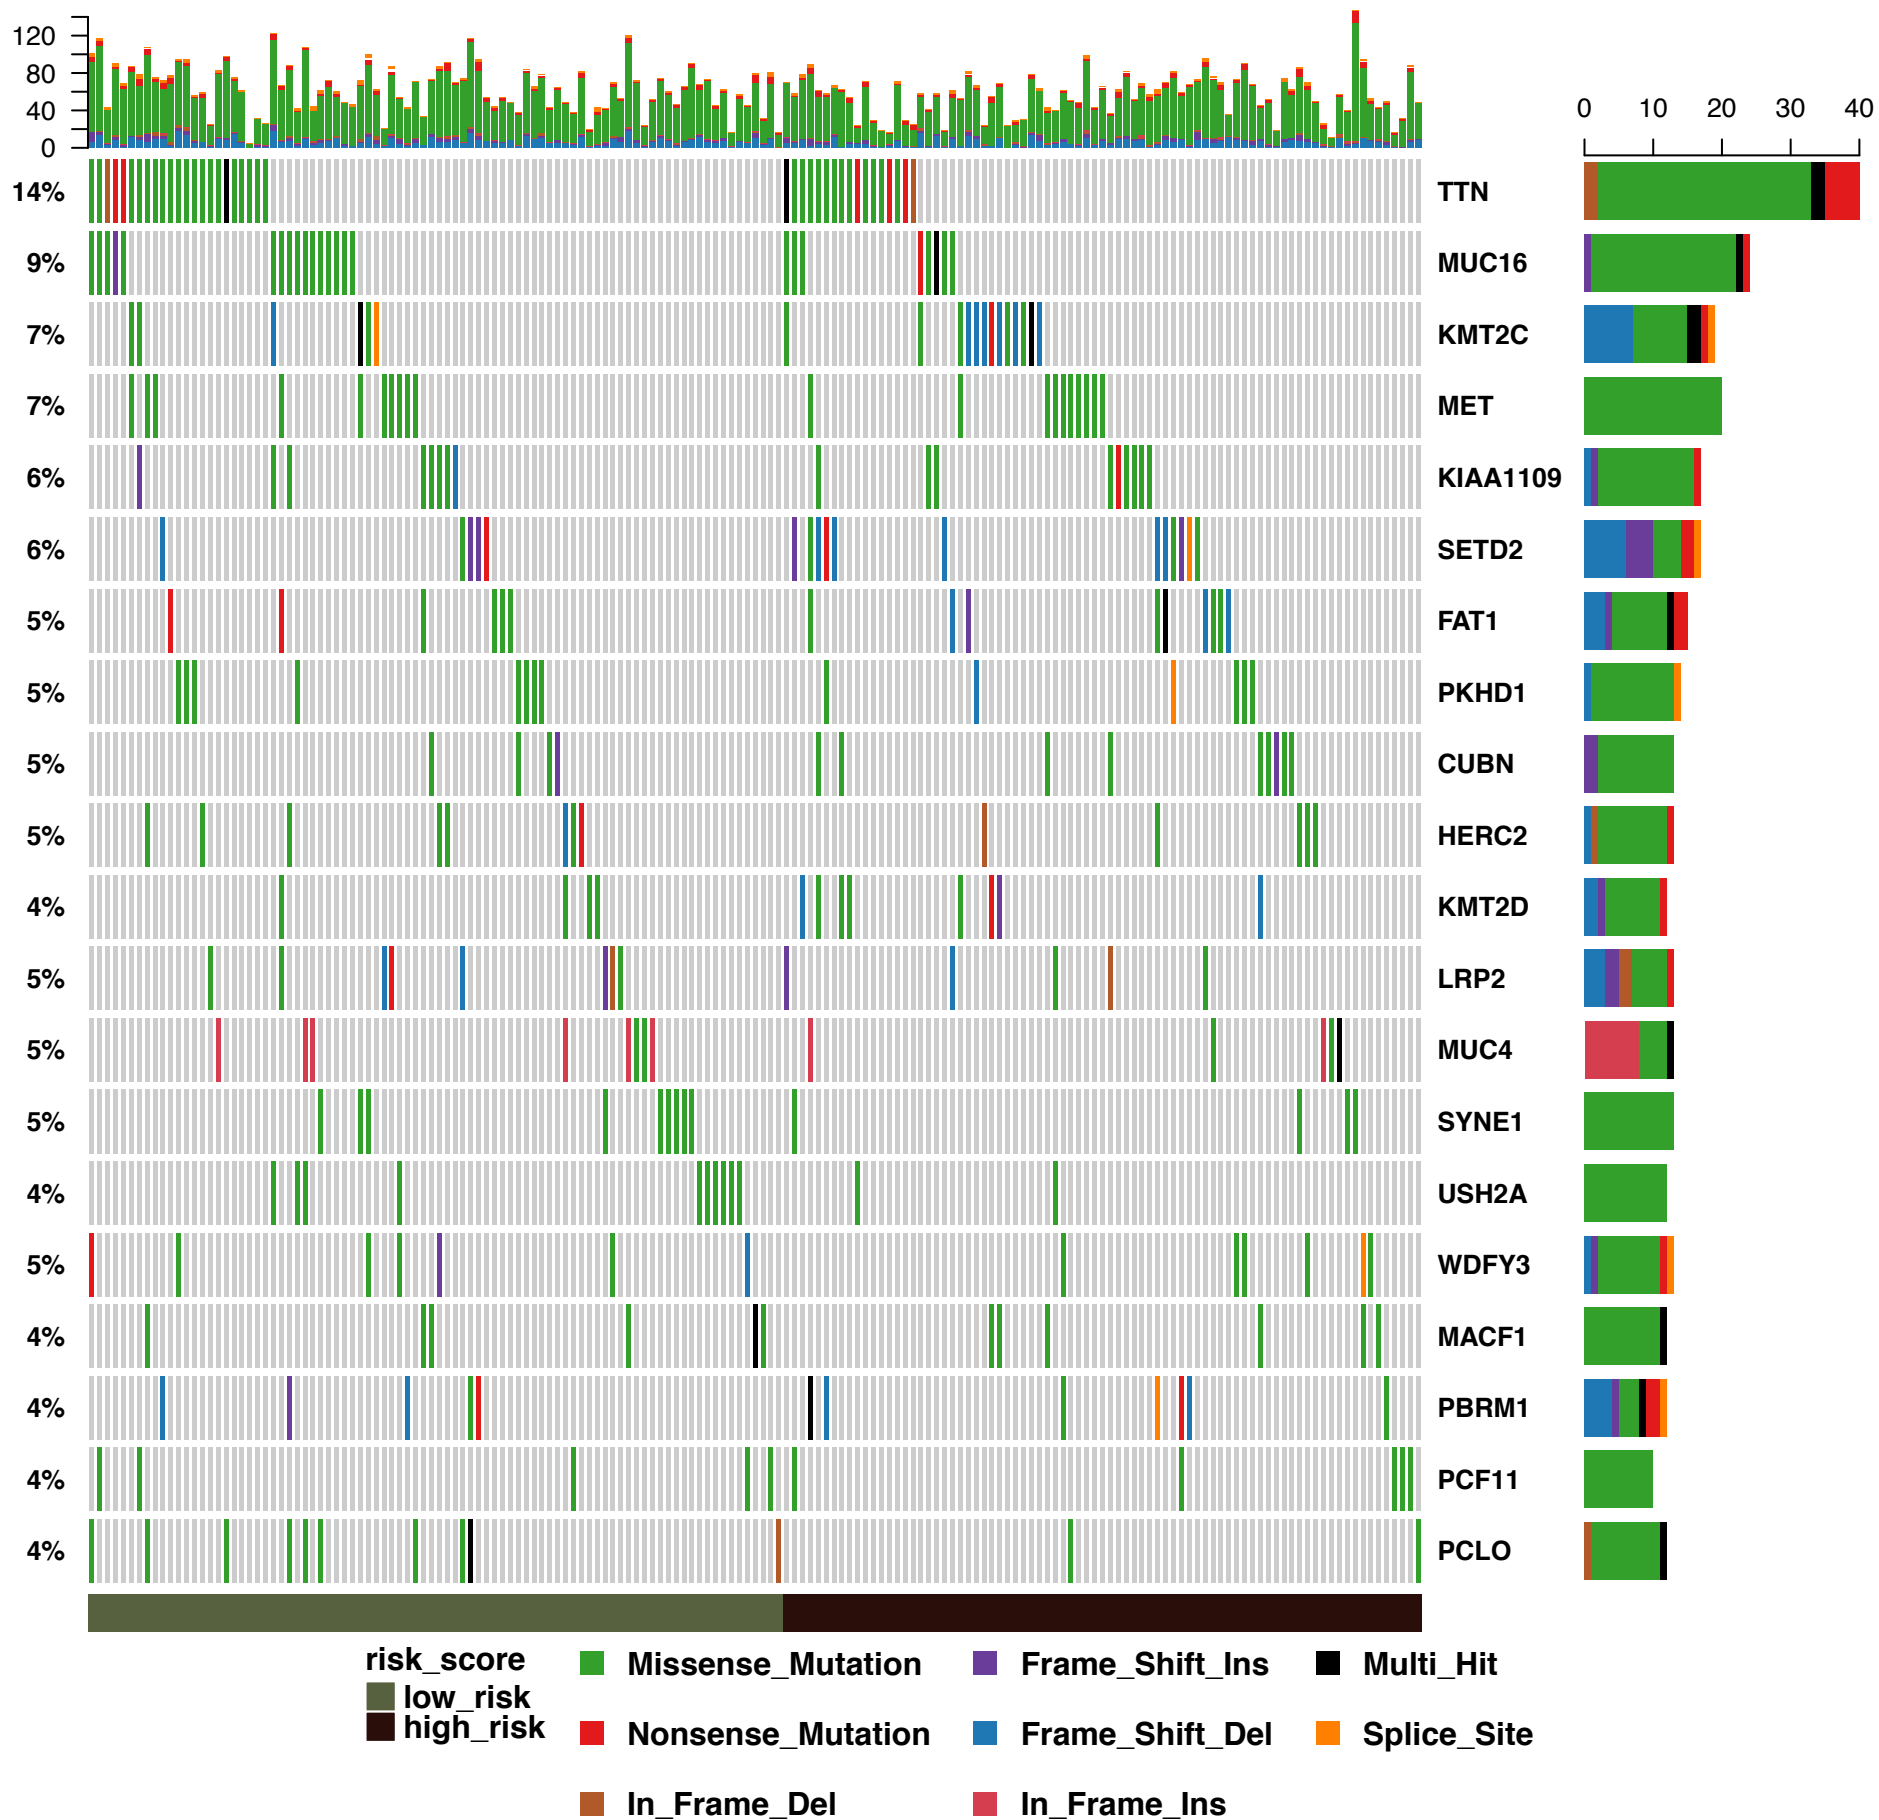

Supplement: CAM4-8-289-s001.pdf [file CAM4-8-289-s001.pdf]
